# Supplementary material for: High capacity potassium-ion battery anodes based on black phosphorus
Source: Royal Society of Chemistry journal article supplement (doi:10.1039/c7ta02483e), 2017-01-01
Supplement: c7ta02483e1.pdf [file c7ta02483e1.pdf]

## Supplementary Information

### High capacity potassium-ion battery anodes based on black phosphorus

Irin Sultana,<sup>a</sup> Md Mokhlesur Rahman,<sup>a</sup> Thrinathreddy Ramireddy,<sup>a</sup> Ying Chen,<sup>a</sup> Alexey M. Glushenkov<sup>\*a,b</sup>

<sup>a</sup> *Institute for Frontier Materials, Deakin University, Geelong Campus at Waurin Ponds, VIC 3216, Australia.*

<sup>b</sup> *Department of Chemical and Biomolecular Engineering, The University of Melbourne, Parkville, VIC 3010, Australia*

Corresponding authors: alexey.glushenkov@unimelb.edu.au

Phone: +61 3 83445109

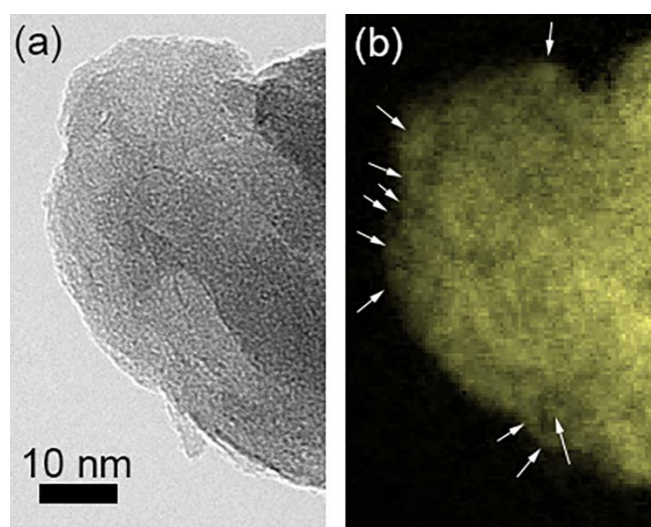

Fig. S1 Energy-filtered images of a thin edge in the specimen: (a) elastic image; (b) P map.

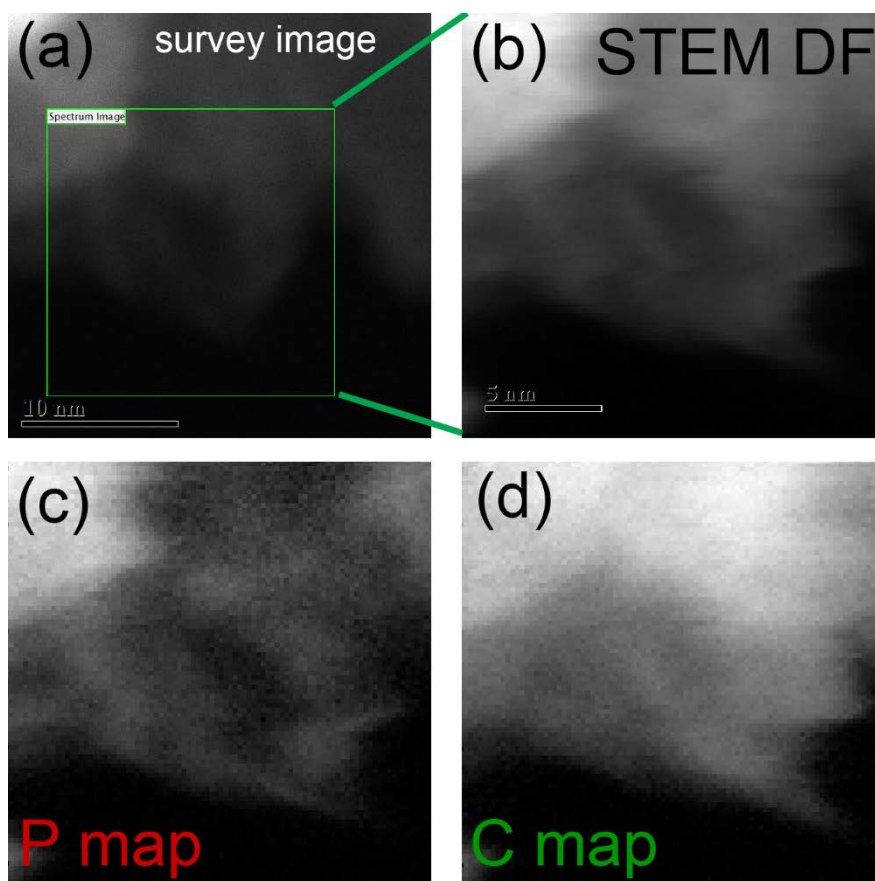

Fig. S2 STEM-EELS spectrum imaging of a thin area in the specimen (BP-C 1:1): (a) survey image; (b) dark-field STEM image of the area of interest; (c, d) P and C maps extracted from the data cube.

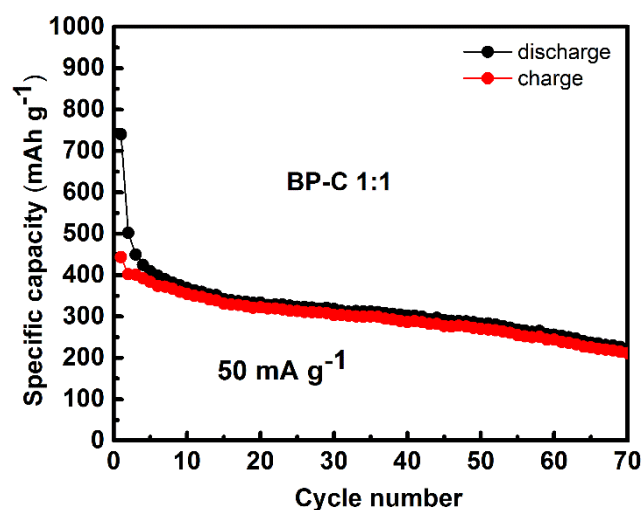

Fig. S3 Cyclic stability of BP-C 1:1 sample in the potential window of 2-0.01 V vs K/K<sup>+</sup>

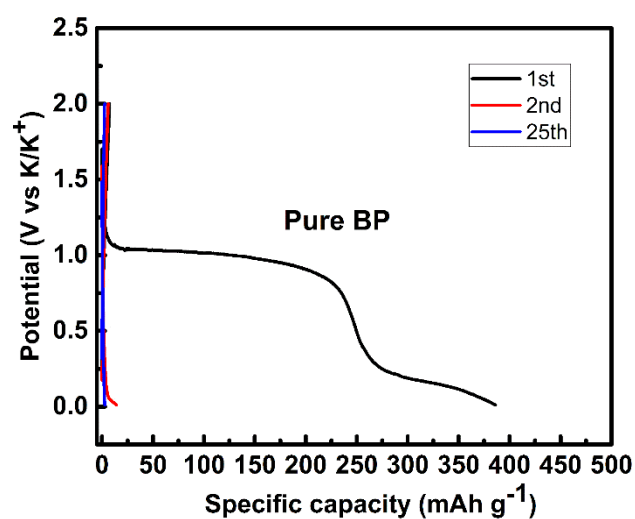

Fig. S4 Charge-discharge profiles of black phosphorus material synthesized by ball milling of red phosphorus. The testing current is 10 mA g<sup>-1</sup>.

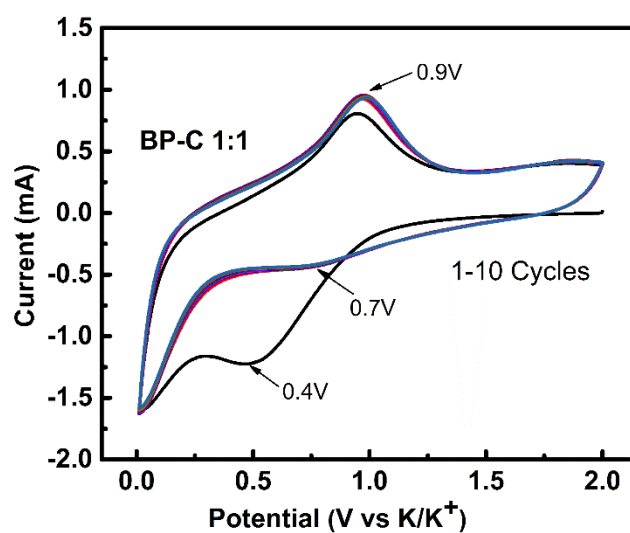

Fig. S5 CV curves of an electrode assembled with BP-C 1:1. The test was performed at a scan rate of  $0.5 \text{ mV s}^{-1}$  within a potential range of 0.01-2.0 V vs K/K<sup>+</sup>.

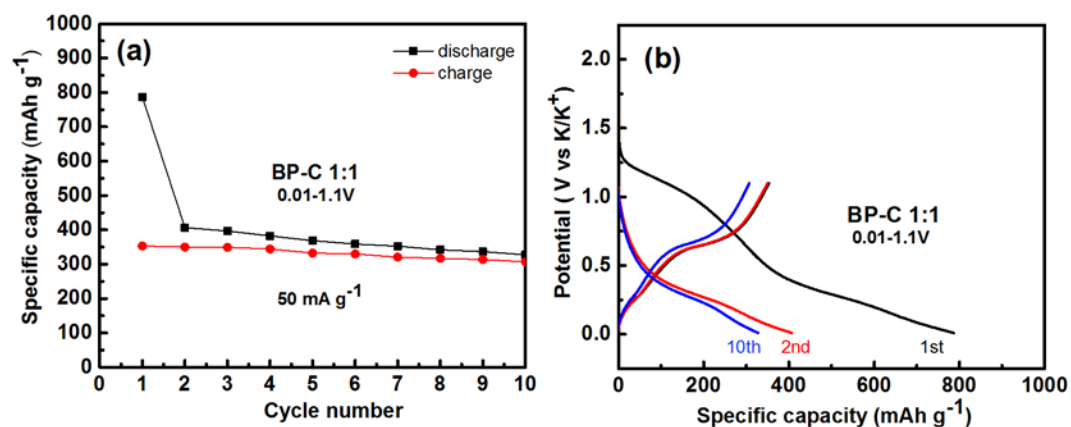

Fig. S6 Preliminary cycling results for sample BP-C 1:1 in the potential window of 1.1 – 0.01 V vs K/K<sup>+</sup>

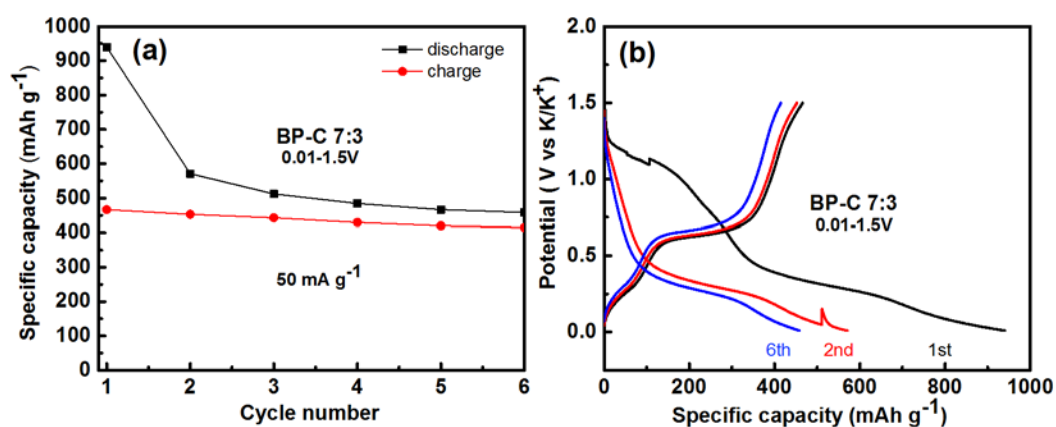

Fig. S7 Preliminary cycling results for sample BP-C 7:3 in the potential window of 1.5 – 0.01 V vs K/K<sup>+</sup>

Table S1. Capacities of BP-C 1:1 and 7:3 electrodes cycled in full and restricted potential windows

| BP-C 1:1 (0.01-2V)                             |                    |                 | BP-C 1:1 (0.01-1.1V)                           |                    |                 |
|------------------------------------------------|--------------------|-----------------|------------------------------------------------|--------------------|-----------------|
| Cycle number                                   | Discharge capacity | Charge capacity | Cycle number                                   | Discharge capacity | Charge capacity |
| 1                                              | 740.1              | 433.2           | 1                                              | 786.7              | 353.0           |
| 2                                              | 502.2              | 402.2           | 2                                              | 406.5              | 349.9           |
| 10                                             | 363.6              | 354.4           | 10                                             | 363.6              | 354.4           |
| Charge capacity stability after 10th cycle 81% |                    |                 | Charge capacity stability after 10th cycle 87% |                    |                 |
| BP-C 7:3 (0.01-2V)                             |                    |                 | BP-C 7:3 (0.01-1.5V)                           |                    |                 |
| Cycle number                                   | Discharge capacity | Charge capacity | Cycle number                                   | Discharge capacity | Charge capacity |
| 1                                              | 917.6              | 616.8           | 1                                              | 940.1              | 466.3           |
| 2                                              | 649.2              | 592.5           | 2                                              | 571.1              | 452.8           |
| 6                                              | 557.6              | 525.8           | 6                                              | 458.5              | 414.9           |
| Charge capacity stability after 6th cycle 85%  |                    |                 | Charge capacity stability after 6th cycle 90%  |                    |                 |

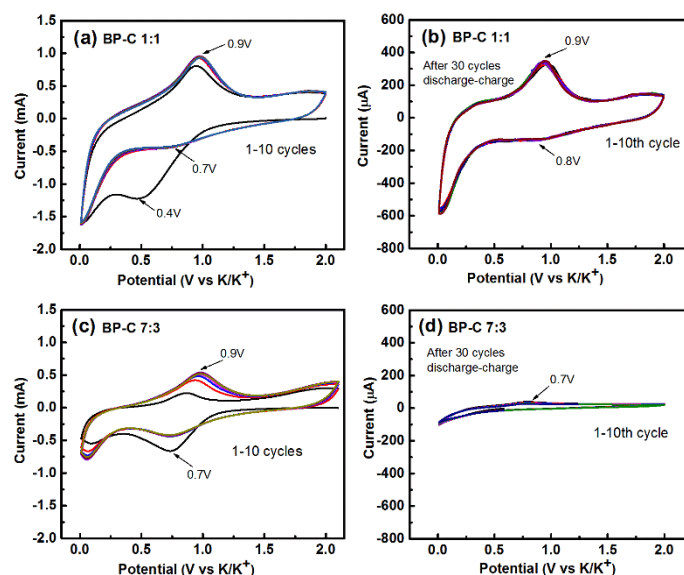

Fig S8 Cyclic voltammetry curves of BP-C 1:1 and 7:3 electrodes before (a,c) and after performing 30 discharge-charge cycles in the potential range of 2-0.01 V vs  $\text{K/K}^+$  (b,d)
